# Supplementary material for: Designing aromatic heterocyclic superacids in terms of Brønsted and Lewis perspectives
Source: Royal Society of Chemistry journal article supplement (doi:10.1039/c9cp06054e), 2019-12-16
Supplement: c9cp06054e1.pdf [file c9cp06054e1.pdf]

Supporting Informaion:

# Designing Aromatic Heterocyclic Superacids in Brønsted and Lewis Perspectives

Rakesh Parida<sup>a,b</sup>, Sachin Ramesh Nambiar<sup>b</sup>, G. Naresh Reddy<sup>a,b</sup>, Santanab Giri<sup>a,\*</sup>

<sup>a</sup>School of Applied Sciences and Humanities, Haldia Institute of Technology, Haldia 721657

<sup>b</sup>Department of Chemistry, National Institute of Technology Rourkela, Odisha 769008.

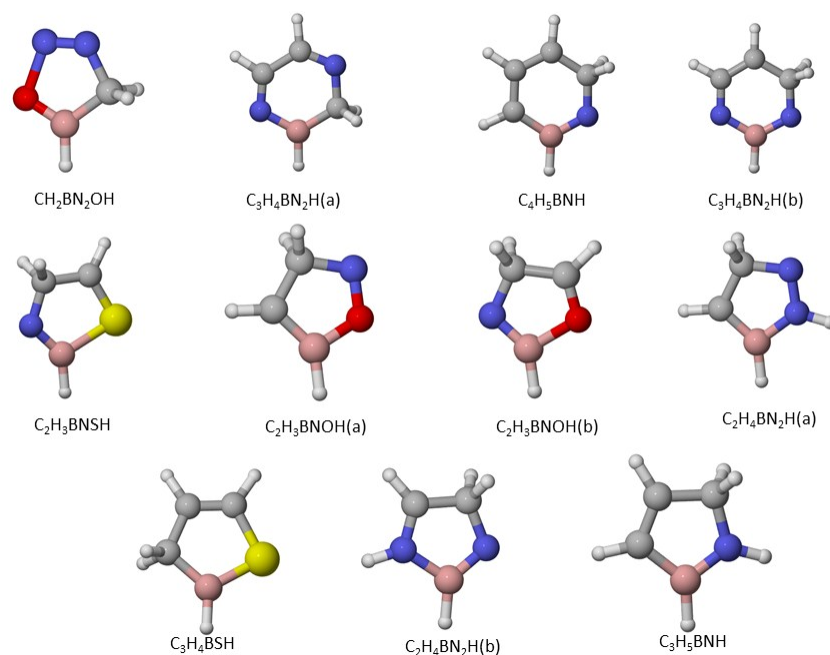

**Figure S1.** Optimized geometries of normal heterocyclic compounds with H-atom at carbon centre.

**Table T1.** Free energy changes due to deprotonation, NICS and  $\text{pK}_a$  of normal heterocyclic molecules. (When H at Carbon centre).

| Molecule                              | Free energy change due to deprotonation $\Delta G$ (kcal/mol) | NICS (0) | NICS (1) | $\text{pK}_a$ |
|---------------------------------------|---------------------------------------------------------------|----------|----------|---------------|
| $\text{CH}_2\text{BN}_2\text{O}$      | 331.78                                                        | -10.5    | -9.1     | 12.57         |
| $\text{C}_3\text{H}_4\text{BN}_2$ (a) | 313.09                                                        | -3.1     | -7.6     | -0.41         |
| $\text{C}_4\text{H}_5\text{BN}$       | 288.74                                                        | -4.3     | -7.2     | -17.54        |
| $\text{C}_3\text{H}_4\text{BN}_2$ (b) | 270.69                                                        | -2.9     | -6.7     | -32.32        |
| $\text{C}_2\text{H}_3\text{BNS}$      | 300.78                                                        | -10.1    | -7.9     | -8.62         |
| $\text{C}_2\text{H}_3\text{BNO}$ (a)  | 288.88                                                        | -9.2     | -7.6     | -21.78        |
| $\text{C}_2\text{H}_3\text{BNO}$ (b)  | 308.16                                                        | -7.8     | -6.3     | -4.09         |
| $\text{C}_2\text{H}_4\text{BN}_2$ (a) | 313.26                                                        | -10.8    | -8.7     | -3.37         |
| $\text{C}_3\text{H}_4\text{BS}$       | 340.67                                                        | -10.2    | -7.9     | 19.41         |
| $\text{C}_2\text{H}_4\text{BN}_2$ (b) | 324.01                                                        | -10.05   | -7.4     | 8.35          |
| $\text{C}_3\text{H}_5\text{BN}$       | 359.45                                                        | -10.5    | -7.3     | 31.10         |

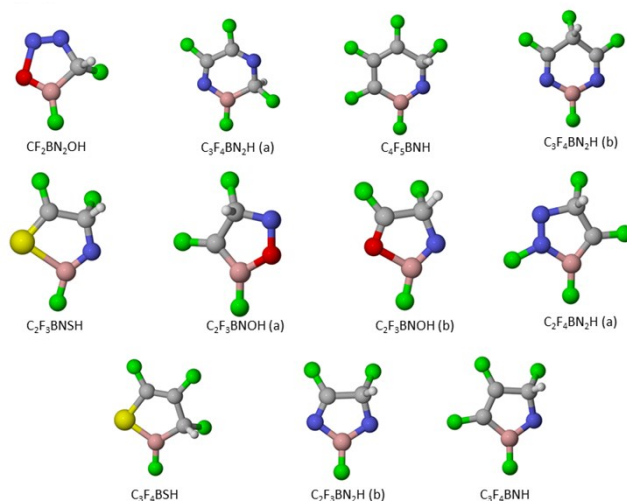

**Figure S2.** Optimized neutral geometries of F-Substituted heterocyclic complex with H-atom at carbon Centre.

**Table T2.** Free energy changes due to deprotonation, NICS and  $pK_a$  of F-substituted Heterocyclic Molecules. (When H at Carbon centre).

| Molecule                                          | Free energy change due to deprotonation ( $\Delta G$ ) (kcal/mol) | NICS (0) | NICS (1) | $pK_a$ |
|---------------------------------------------------|-------------------------------------------------------------------|----------|----------|--------|
| CF <sub>2</sub> BN <sub>2</sub> O                 | 317.05                                                            | -9.2     | -6.4     | 3.85   |
| C <sub>3</sub> F <sub>4</sub> BN <sub>2</sub> (a) | 290.66                                                            | -10.8    | -8.7     | -10.94 |
| C <sub>4</sub> F <sub>5</sub> BN                  | 258.95                                                            | -14.2    | -8.9     | -33.36 |
| C <sub>3</sub> F <sub>4</sub> BN <sub>2</sub> (b) | 296.47                                                            | -9.2     | -6.9     | -6.88  |
| C <sub>2</sub> F <sub>3</sub> BNS                 | 289.42                                                            | -11.5    | -5.1     | -13.24 |
| C <sub>2</sub> F <sub>3</sub> BNO (a)             | 262.03                                                            | -14.4    | -5.9     | -37.30 |
| C <sub>2</sub> F <sub>3</sub> BNO (b)             | 300.55                                                            | -10.9    | -4.1     | -6.45  |
| C <sub>2</sub> F <sub>4</sub> BN <sub>2</sub> (a) | 287.20                                                            | -18.9    | -7.2     | -16.82 |
| C <sub>3</sub> F <sub>4</sub> BS                  | 327.09                                                            | -16.9    | -8.2     | 15.56  |
| C <sub>2</sub> F <sub>3</sub> BN <sub>2</sub> (b) | 293.79                                                            | -2.8     | -2.0     | -34.29 |
| C <sub>3</sub> F <sub>4</sub> BN                  | 300.41                                                            | -9.0     | -2.0     | -22.26 |

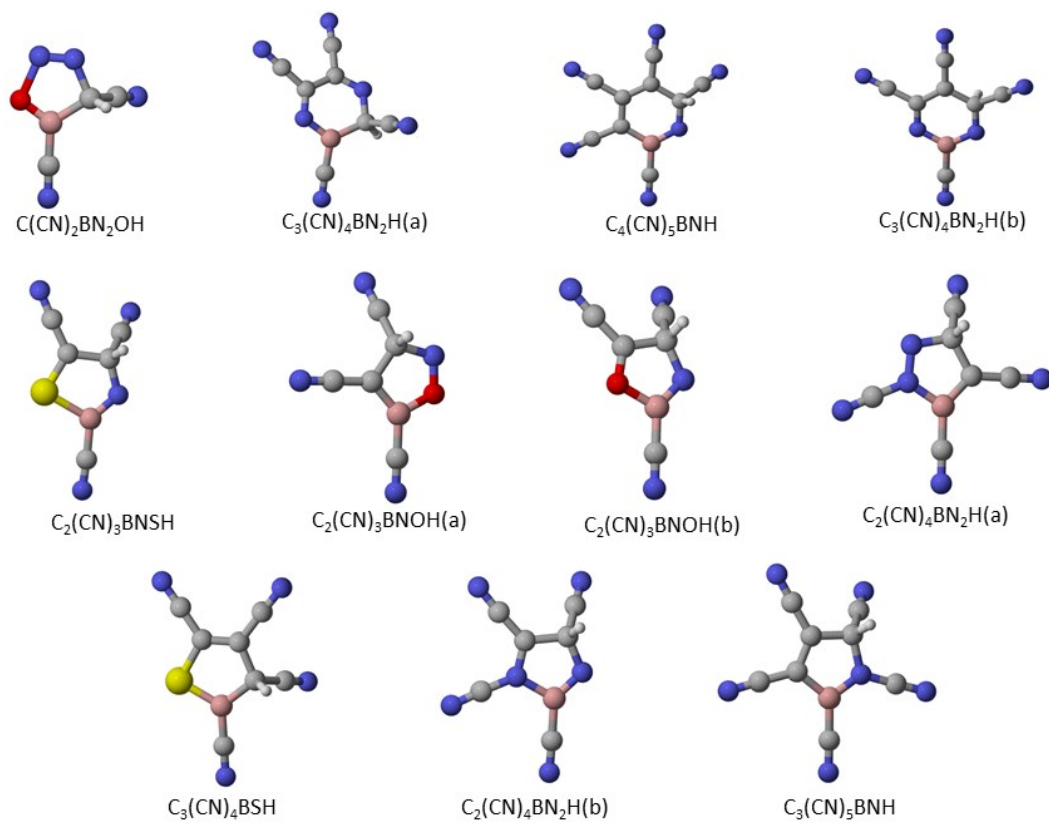

**Figure S3.** Optimized neutral geometries of CN-Substituted heterocyclic complex with H-atom at carbon centre.

**Table S3.** Free energy changes due to deprotonation, NICS and  $pK_a$  of CN-substituted Heterocyclic Molecules. (When H at Carbon centre).

| Molecule            | Free energy change due to deprotonation $\Delta G$ (kcal/mol) | NICS (0) | NICS (1) | $pK_a$ |
|---------------------|---------------------------------------------------------------|----------|----------|--------|
| $C(CN)_2BN_2O$      | 282.70                                                        | -10.9    | -9.0     | -13.24 |
| $C_3(CN)_4BN_2$ (a) | 243.00                                                        | -6.1     | -8.7     | -65.99 |
| $C_4(CN)_5BN$       | 208.41                                                        | -7.5     | -8.3     | -38.57 |
| $C_3(CN)_4BN_2$ (b) | 202.51                                                        | -6.0     | -8.1     | -49.93 |
| $C_2(CN)_3BNS$      | 242.50                                                        | -11.1    | -8.7     | -39.61 |
| $C_2(CN)_3BNO$ (a)  | 229.66                                                        | -10.6    | -8.1     | -46.02 |
| $C_2(CN)_3BNO$ (b)  | 242.26                                                        | -10.0    | -7.7     | -18.98 |
| $C_2(CN)_4BN_2$ (a) | 230.83                                                        | -12.7    | -8.6     | -40.23 |
| $C_3(CN)_4BS$       | 266.15                                                        | -12.4    | -8.5     | -17.71 |
| $C_2(CN)_4BN_2$ (b) | 238.22                                                        | -11.6    | -7.9     | -37.03 |
| $C_3(CN)_5BN$       | 265.04                                                        | -13.5    | -7.9     | -60.14 |
